# Supplementary material for: Cohort profile: a national, population-based cohort of children born after assisted conception in the UK (1992–2009): methodology and birthweight analysis
Source: HighWire-hosted journal article supplement (doi:10.1136/bmjopen-2021-050931), 2021-07-01
Supplement: bmjopen-2021-050931supp001_data_supplement.pdf [file bmjopen-2021-050931supp001_data_supplement.pdf]

### Supplementary Files

#### S1: Completeness of variables (for the purpose of linkage and analysis) on the HFEA register

| Variable                                 | Useable*<br>entry | Entry 'Null' | No<br>entry | Other**                                  | % useable<br>out of total<br>no. of entries |
|------------------------------------------|-------------------|--------------|-------------|------------------------------------------|---------------------------------------------|
| DOB                                      | 110,204           | 374          | 0           | 18                                       | 99.6%                                       |
| Sex of Child                             | 110,484           | 112          | 0           | 0                                        | 99.9%                                       |
| Male                                     | 56,265            |              |             |                                          |                                             |
| Female                                   | 54,219            |              |             |                                          |                                             |
| BW                                       | 109,157           | 534          | 0           | 905 records with BW <600g ***            | 98.7%                                       |
| Child's Surname                          | 12,332            | 97,671       | 0           | 593                                      | 11.2%                                       |
| Child's Forename                         | 11,402            | 97,670       | 0           | 1524                                     | 10.3%                                       |
| Child's Town of Birth                    | 70,738            | 39,689       | 61          | 108                                      | 64.0%                                       |
| Child's District of Birth                | 18,833            | 91,452       | 298         | 13                                       | 17.0%                                       |
| Child's Town <i>or</i> District of Birth | 71,650            | 38,787       | 51          | 108                                      | 64.8%                                       |
| Country of Birth                         | 67554             | 38,861       | 0           | 4181 cases born outside of Great Britain | 61.1%                                       |
| Mother's Surname                         | 110,596           | 0            | 0           | 0                                        | 100%                                        |
| Mother's Forename                        | 110,588           | 0            | 8           | 0                                        | 100.0%                                      |
| Mother's Surname at Birth                | 51,237            | 58,714       | 209         | 436                                      | 46.3%                                       |
| Mother's Forename at Birth               | 3,323             | 106,895      | 377         | 1                                        | 3.0%                                        |
| Mother's DOB                             | 110,569           | 1            | 0           | 26                                       | 100.0%                                      |
| Father's Surname                         | 110,450           | 138          | 8           | 0                                        | 99.9%                                       |
| Father's Forename                        | 110,384           | 202          | 8           | 2                                        | 99.8%                                       |
| Father's DOB                             | 110,282           | 257          | 0           | 57                                       | 99.7%                                       |
| Mother's Town or District of Birth       | 62,505            | 47,045       | 0           | 1046                                     | 56.5%                                       |
| Mother's Country of Birth                | 64,396            | 46,190       | 0           | 10                                       | 58.2%                                       |
| Father's Town or District of Birth       | 61,143            | 48,354       | 0           | 1099                                     | 55.3%                                       |
| Father's Country of Birth                | 63,100            | 47,485       | 0           | 11                                       | 57.1%                                       |
| Treatment Cycle Start Date               | 110,596           | 0            | 0           | 0                                        | 100%                                        |
| Treatment Centre No/ Name                | 110,594           | 0            | 0           | 2                                        | 100.0%                                      |

HFEA: Human Fertilization and Embryology Authority; DOB: date of birth; BW: birth weight

\* 'Useable' data refers to records which contain data that appears useable in some analyses, including initial quality control analyses.

\*\* 'Other' refers to unusable information for the variable in question, most commonly variations of 'Not known', 'Unknown' etc.

\*\*\*905 records with documented BWs less than 600g were considered as invalid information for the purpose of deterministic linkage. Whilst a small number of these BWs (<600g) are likely to be correct, many more are likely to be data errors within the HFEA register. All actual recorded BWs were used when manually viewing potential matches.

This table was shared with us by HFEA at the start of the study.

**S2- Flow diagram showing derivation of File 2 in Figure 1.**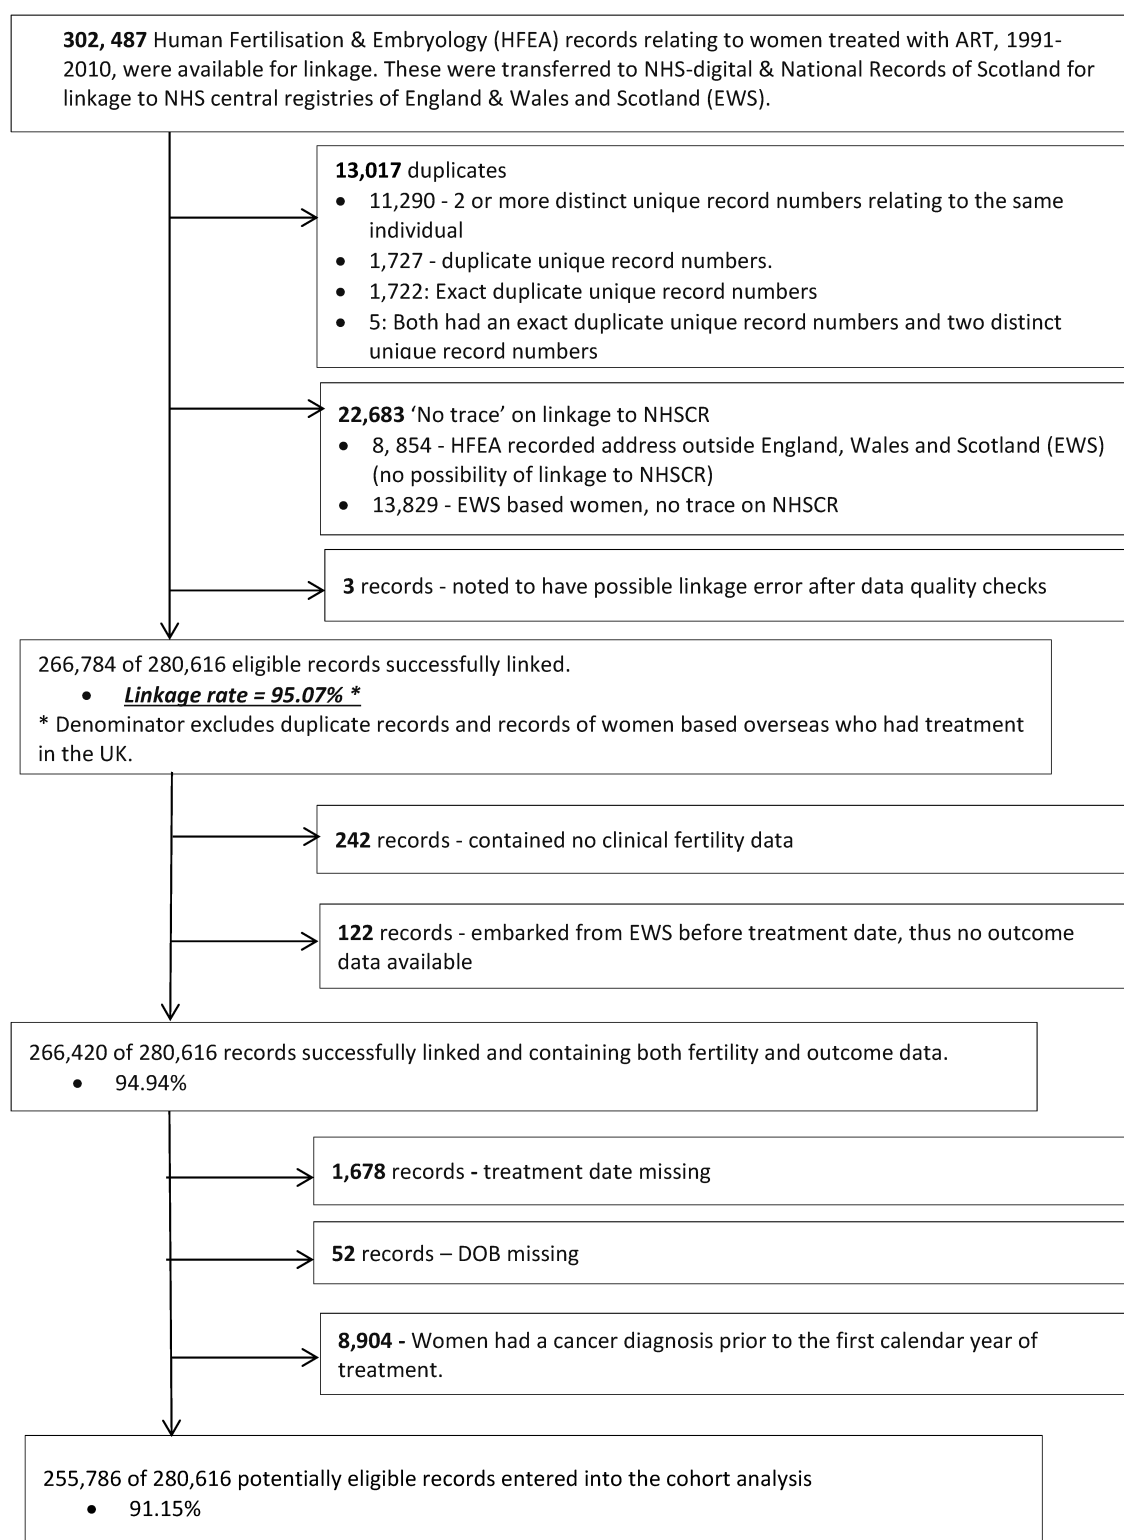

HFEA: Human Fertilization and Embryology Authority; DOB: date of birth; EWS: England, Wales & Scotland; NHSCR: National Health Service Central Register

**S3: Order of pregnancy (HFEA-ONS cohort)**

| No. of pregnancies | Order of pregnancy | ART                 |                | Spontaneously conceived siblings |                |
|--------------------|--------------------|---------------------|----------------|----------------------------------|----------------|
|                    |                    | Singleton pregnancy | Twin Pregnancy | Singleton pregnancy              | Twin Pregnancy |
| <b>2 (n=8441)</b>  | 1                  | 5135                | 1182           | 2095                             | 29             |
|                    | 2                  | 1596                | 528            | 6161                             | 156            |
| <b>3 (n=1336)</b>  | 1                  | 918                 | 107            | 304                              | 7              |
|                    | 2                  | 453                 | 96             | 777                              | 10             |
|                    | 3                  | 126                 | 26             | 1155                             | 29             |
| <b>4 (n=125)</b>   | 1                  | 83                  | 9              | 33                               | 0              |
|                    | 2                  | 42                  | 5              | 77                               | 1              |
|                    | 3                  | 19                  | 6              | 99                               | 1              |
|                    | 4                  | 7                   | 4              | 113                              | 1              |
| <b>5 (n=12)</b>    | 1                  | 8                   | 1              | 2                                | 1              |
|                    | 2                  | 5                   | 1              | 6                                | 0              |
|                    | 3                  | 2                   | 0              | 10                               | 0              |
|                    | 4                  | 0                   | 0              | 12                               | 0              |
|                    | 5                  | 0                   | 0              | 12                               | 0              |
| <b>6 (n=1)</b>     | 1                  | 1                   | 0              | 0                                | 0              |
|                    | 2                  | 0                   | 0              | 1                                | 0              |
|                    | 3                  | 0                   | 0              | 1                                | 0              |
|                    | 4                  | 0                   | 0              | 1                                | 0              |
|                    | 5                  | 0                   | 0              | 1                                | 0              |
|                    | 6                  | 0                   | 0              | 1                                | 0              |
| <b>7 (n=1)</b>     | 1                  | 0                   | 1              | 0                                | 0              |
|                    | 2                  | 0                   | 0              | 1                                | 0              |
|                    | 3                  | 0                   | 0              | 1                                | 1              |
|                    | 4                  | 0                   | 0              | 0                                | 0              |
|                    | 5                  | 0                   | 0              | 1                                | 0              |
|                    | 6                  | 0                   | 0              | 1                                | 0              |
|                    | 7                  | 0                   | 0              | 1                                | 0              |

HFEA: Human Fertilization and Embryology Authority; ONS: Office for National Statistics.

**S4: Multiple regression coefficients for adjusted mean BW- ART vs NCP (HFEA-ONS)**

| Variables                            | BW Coefficient | 95% Confidence interval |
|--------------------------------------|----------------|-------------------------|
| <b><u>Embryo transfer status</u></b> |                |                         |
| Fresh                                | -131.4         | (-139.5 - -123.4)       |
| Frozen                               | 35.24          | (18.97 - 51.52)         |
| <b><u>Sex</u></b>                    |                |                         |
| Male                                 | 119.1          | (112.7 - 125.5)         |
| <b><u>Maternal age group</u></b>     |                |                         |
| 25-29                                | 66.68          | (55.89 - 77.48)         |
| 30-34                                | 111.9          | (102.2 - 121.6)         |
| 35-39                                | 129.2          | (118.7 - 139.7)         |
| 40-44                                | 132.3          | (118.0 - 146.5)         |
| >=45                                 | 72.66          | (-13.46 - 158.8)        |
| <b>Constant</b>                      | 3,215          | (3,207 - 3,223)         |
| <b>Observations</b>                  | 129,304        |                         |
| <b>R-squared</b>                     | 0.021          |                         |

BW: birth weight; NCP: naturally conceived population controls; HFEA: Human Fertilization and Embryology Authority; ONS: Office for National Statistics.

**S5: Multiple regression coefficients for adjusted mean BW- sART vs NCS (HFEA-ONS)**

| VARIABLES                            | BW coefficient | 95% Confidence interval |
|--------------------------------------|----------------|-------------------------|
| <b><u>Embryo transfer status</u></b> |                |                         |
| Fresh                                | -54.69         | (-72.64 - -36.73)       |
| Frozen                               | 138.6          | (101.3 - 175.9)         |
| <b><u>Sex</u></b>                    |                |                         |
| Male                                 | 115.6          | (97.78 - 133.4)         |
| <b><u>Maternal age group</u></b>     |                |                         |
| 25-29                                | -43.23         | (-114.2 - 27.74)        |
| 30-34                                | -98.50         | (-176.5 - -20.46)       |
| 35-39                                | -117.1         | (-206.8 - -27.41)       |
| 40-44                                | -161.8         | (-266.1 - -57.52)       |
| >=45                                 | -198.7         | (-409.2 - 11.79)        |
| <b><u>Order of pregnancy</u></b>     |                |                         |
| 2                                    | 165.6          | (142.2 - 188.9)         |
| >=3                                  | 237.0          | (194.4 - 279.6)         |
| <b>Constant</b>                      | 3,337          | (3,263 - 3,411)         |
| <b>Observations</b>                  | 22,086         |                         |
| <b>R-squared</b>                     | 0.081          |                         |

BW: birth weight; sART: ART with siblings; NCS- naturally conceived siblings; HFEA: Human Fertilization and Embryology

Authority; ONS: Office for National Statistics.

**S6: Multiple regression coefficients for adjusted mean BW- ART vs NCP (HFEA-ONS-HES cohort)**

| Variables                                 | BW coefficient | 95% confidence interval |
|-------------------------------------------|----------------|-------------------------|
| <b><u>Embryo transfer status</u></b>      |                |                         |
| Fresh                                     | -152.2         | (-162.2 - -142.3)       |
| Frozen                                    | 2.855          | (-16.61 - 22.32)        |
| <b><u>Sex</u></b>                         |                |                         |
| Male                                      | 120.6          | (112.7 - 128.6)         |
| <b><u>Maternal age group</u></b>          |                |                         |
| 25-29                                     | 57.25          | (43.52 - 70.99)         |
| 30-34                                     | 86.40          | (73.80 - 99.00)         |
| 35-39                                     | 91.20          | (77.62 - 104.8)         |
| 40-44                                     | 98.57          | (80.37 - 116.8)         |
| 45-49                                     | 4.103          | (-63.56 - 71.77)        |
| Missing                                   | 94.69          | (60.19 - 129.2)         |
| <b><u>IMD at earliest appointment</u></b> |                |                         |
| 2                                         | 25.95          | (8.336 - 43.57)         |
| 3                                         | 56.66          | (38.69 - 74.64)         |
| 4                                         | 58.78          | (40.66 - 76.91)         |
| 5                                         | 75.13          | (56.93 - 93.34)         |
| 6                                         | 93.33          | (75.06 - 111.6)         |
| 7                                         | 93.21          | (75.17 - 111.2)         |
| 8                                         | 111.8          | (93.76 - 129.8)         |
| 9                                         | 117.3          | (99.48 - 135.1)         |
| 10                                        | 134.7          | (116.5 - 152.8)         |
| <b><u>Derived ethnicity</u></b>           |                |                         |
| Asian/Asian British                       | -247.8         | (-264.2 - -231.4)       |
| Black/African/Caribbean/Black British     | -138.2         | (-161.2 - -115.2)       |
| Chinese                                   | -120.1         | (-195.7 - -44.43)       |
| Mixed/multiple ethnic groups              | -66.13         | (-94.92 - -37.33)       |
| Not stated/Not known                      | 5.034          | (-5.060 - 15.13)        |
| Other ethnic group                        | -49.19         | (-82.25 - -16.13)       |
| <b>Constant</b>                           | 3,177          | (3,162 - 3,192)         |
| <b>Observations</b>                       | 85,366         |                         |
| <b>R-squared</b>                          | 0.040          |                         |

BW: birth weight; NCP- naturally conceived population controls; HFEA: Human Fertilization and Embryology Authority; ONS: Office for National Statistics; HES: Hospital Episode Statistics; IMD: Index of Multiple Deprivation

### S7: Multiple regression coefficients for adjusted mean BW- sART vs NCS (HFEA-ONS-HES cohort)

| Variables                            | BW coefficient | 95% Confidence interval |
|--------------------------------------|----------------|-------------------------|
| <b><u>Embryo transfer status</u></b> |                |                         |
| Fresh                                | -57.01         | (-75.79 - -38.23)       |
| Frozen                               | 152.1          | (113.5 - 190.7)         |
| <b><u>Sex</u></b>                    |                |                         |
| Male                                 | 115.6          | (96.95 – 134.2)         |
| <b><u>Maternal age group</u></b>     |                |                         |
| 25-29                                | -28.73         | (-104.3 - -46.84)       |
| 30-34                                | -81.27         | (-164.9 – 2.335)        |
| 35-39                                | -96.01         | (-192.0 - -0.010)       |
| 40-44                                | -135.4         | (-246.9 - -23.89)       |
| >=45                                 | -141.6         | (-308.8 - -25.69)       |
| <b><u>Order of pregnancy</u></b>     |                |                         |
| 2                                    | 152.2          | (127.8 – 176.6)         |
| >=3                                  | 229.6          | (184.3 – 274.8)         |
| <b>Constant</b>                      | 3,332          | (3,252 - 3,412)         |
| <b>Observations</b>                  | 19180          |                         |
| <b>R-squared</b>                     | 0.09           |                         |

BW: birth weight; sART: ART with siblings; NCS- naturally conceived siblings; HFEA: Human Fertilization and Embryology Authority; ONS: Office for National Statistics.

### S8: Distribution of maternal age in records born before 1997 and not linked to HES

|                                  | ART           | CONTROL        | SIBLING       |
|----------------------------------|---------------|----------------|---------------|
| <b><u>Maternal age group</u></b> |               |                |               |
| <=25                             | 91 (0.79%)    | 5804 (15.57%)  | 84 (2.45%)    |
| 25-29                            | 1360 (11.84%) | 5496 (14.74%)  | 179 (5.22%)   |
| 30-34                            | 4781 (41.62%) | 7592 (20.37%)  | 636 (18.55%)  |
| 35-39                            | 4318 (37.59%) | 4738 (12.71%)  | 873 (25.46%)  |
| 40-44                            | 921 (8.02%)   | 1160 (3.11%)   | 357 (10.41%)  |
| >=45                             | 11 (0.10%)    | 132 (0.35%)    | 27 (0.79%)    |
| Missing                          | 5 (0.04%)     | 12357 (33.15%) | 1273 (37.12%) |

HES: Hospital Episode Statistics
